# Supplementary material for: Daily Ingestion of Eggplant Powder Improves Blood Pressure and Psychological State in Stressed Individuals: A Randomized Placebo-Controlled Study
Source: PubMed Central journal article supplement (PMC6893753; doi:10.3390/nu11112797), 2019-11-16
Supplement: nutrients-11-02797-s001.pdf [file nutrients-11-02797-s001.pdf]

**Table S1.** Changes in blood pressure from week 0

|                                                                          |                      | Week 0     | $\Delta$ Week 4 | $\Delta$ Week 8 | $\Delta$ Week 12 | $\Delta$ Week 16 | <i>time x food interaction, p<sup>b</sup></i> |
|--------------------------------------------------------------------------|----------------------|------------|-----------------|-----------------|------------------|------------------|-----------------------------------------------|
| Hospital SBP (mmHg)                                                      | Placebo              | 134.1±14.0 | -2.7±11.0       | -0.9±11.8       | 1.0±11.5         | -1.9±12.9        | 0.018*                                        |
|                                                                          | Eggplant             | 131.8±10.6 | 0.4±13.0        | -2.9±10.1       | -1.9±9.3         | -0.8±12.4        |                                               |
|                                                                          | <i>p<sup>a</sup></i> | 0.43       | 0.26            | 0.42            | 0.24             | 0.70             |                                               |
| Hospital DBP (mmHg)                                                      | Placebo              | 83.5±10.4  | 0.3±6.3         | 2.0±6.5         | 1.2±5.8          | 0.9±8.0          | 0.13                                          |
|                                                                          | Eggplant             | 83.0±8.5   | 0.2±6.6         | -1.3±5.9        | -0.5±6.0         | 0.5±7.0          |                                               |
|                                                                          | <i>p<sup>a</sup></i> | 0.80       | 0.93            | 0.024*          | 0.20             | 0.85             |                                               |
| Hospital SBP in participants with normal-high BP (mmHg)                  | Placebo              | 125.5±9.1  | 0.3±12.1        | 2.6±12.2        | 4.0±12.4         | 2.3±11.8         | 0.14                                          |
|                                                                          | Eggplant             | 127.1±6.8  | 0.8±14.2        | -2.0±10.0       | 0.5±8.8          | 1.7±11.5         |                                               |
|                                                                          | <i>p<sup>a</sup></i> | 0.48       | 0.90            | 0.14            | 0.24             | 0.86             |                                               |
| Hospital DBP in participants with normal-high BP (mmHg)                  | Placebo              | 77.0±5.6   | 2.5±5.6         | 4.8±4.7         | 2.3±5.3          | 3.3±7.3          | 0.043*                                        |
|                                                                          | Eggplant             | 80.1±6.4   | 0.5±6.7         | -0.8±5.7        | 0.9±5.9          | 2.0±7.3          |                                               |
|                                                                          | <i>p<sup>a</sup></i> | 0.069      | 0.26            | p<0.001**       | 0.36             | 0.52             |                                               |
| Hospital SBP in participants with grade 1 hypertension (mmHg)            | Placebo              | 149.0±5.9  | -8.1±6.0        | -6.9±8.2        | -4.3±7.6         | -9.0±12.0        | 0.028*                                        |
|                                                                          | Eggplant             | 146.1±5.8  | -1.0±8.8        | -5.7±10.6       | -9.0±6.9         | -8.1±12.9        |                                               |
|                                                                          | <i>p<sup>a</sup></i> | 0.26       | 0.055           | 0.75            | 0.14             | 0.87             |                                               |
| Hospital DBP in participants with grade 1 hypertension (mmHg)            | Placebo              | 94.8±5.9   | -3.4±6.0        | -2.7±6.7        | -0.7±6.2         | -3.3±7.5         | 0.079                                         |
|                                                                          | Eggplant             | 91.7±8.5   | -0.8±6.6        | -2.6±6.5        | -4.9±4.2         | -3.8±3.3         |                                               |
|                                                                          | <i>p<sup>a</sup></i> | 0.30       | 0.33            | 0.95            | 0.089            | 0.84             |                                               |
| Home SBP in the morning (mmHg)                                           | Placebo              | 131.5±12.7 | -0.3±7.7        | 2.0±7.7         | 3.7±8.7          | 1.4±8.0          | 0.54                                          |
|                                                                          | Eggplant             | 133.6±14.1 | -4.8±8.4        | -0.9±8.2        | 1.1±8.3          | 1.3±9.9          |                                               |
|                                                                          | <i>p<sup>a</sup></i> | 0.49       | 0.017*          | 0.12            | 0.18             | 0.98             |                                               |
| Home DBP in the morning (mmHg)                                           | Placebo              | 81.2±10.6  | 0.4±5.6         | 1.7±5.7         | 2.6±6.0          | 1.9±5.5          | 0.54                                          |
|                                                                          | Eggplant             | 83.1±9.8   | -2.3±5.4        | -0.4±5.2        | 1.0±4.7          | 0.8±6.4          |                                               |
|                                                                          | <i>p<sup>a</sup></i> | 0.44       | 0.032*          | 0.087           | 0.22             | 0.41             |                                               |
| Home SBP in the morning in participants with normal-high BP (mmHg)       | Placebo              | 127.1±11.0 | 0.6±6.8         | 2.8±6.5         | 4.4±2.3          | 0.9±7.3          | 0.54                                          |
|                                                                          | Eggplant             | 129.6±12.1 | -3.2±6.6        | 0.9±7.1         | 2.3±7.4          | 3.6±8.5          |                                               |
|                                                                          | <i>p<sup>a</sup></i> | 0.44       | 0.041*          | 0.32            | 0.27             | 0.22             |                                               |
| Home DBP in the morning in participants with normal-high BP (mmHg)       | Placebo              | 77.3±9.4   | 1.7±5.1         | 1.9±6.0         | 3.3±5.8          | 2.2±6.4          | 0.31                                          |
|                                                                          | Eggplant             | 81.3±8.4   | -1.8±4.2        | 0.0±5.2         | 1.3±4.1          | 1.5±5.5          |                                               |
|                                                                          | <i>p<sup>a</sup></i> | 0.12       | 0.008**         | 0.22            | 0.16             | 0.64             |                                               |
| Home SBP in the morning in participants with grade 1 hypertension (mmHg) | Placebo              | 139.0±12.2 | -2.0±9.2        | 0.5±9.5         | 2.6±11.6         | 2.3±9.3          | 0.81                                          |
|                                                                          | Eggplant             | 145.4±13.7 | -9.6±11.6       | -6.4±9.0        | -2.4±10.3        | -5.4±11.3        |                                               |
|                                                                          | <i>p<sup>a</sup></i> | 0.24       | 0.09            | 0.09            | 0.31             | 0.09             |                                               |
| Home DBP in the morning in participants with grade 1 hypertension (mmHg) | Placebo              | 88.0±9.2   | -1.8±5.9        | 1.4±5.2         | 1.3±6.3          | 1.3±3.4          | 0.70                                          |
|                                                                          | Eggplant             | 88.4±12.2  | -3.9±8.2        | -1.8±5.2        | 0.1±6.5          | -1.3±8.6         |                                               |
|                                                                          | <i>p<sup>a</sup></i> | 0.91       | 0.48            | 0.16            | 0.68             | 0.41             |                                               |
| Home SBP in the evening (mmHg)                                           | Placebo              | 126.7±11.9 | 0.0±8.4         | 4.0±8.5         | 6.3±11.1         | 5.7±11.1         | 0.88                                          |
|                                                                          | Eggplant             | 127.8±12.1 | -0.9±7.1        | 2.1±7.3         | 4.7±9.0          | 3.7±9.9          |                                               |
|                                                                          | <i>p<sup>a</sup></i> | 0.69       | 0.64            | 0.31            | 0.51             | 0.41             |                                               |
|                                                                          | Placebo              | 75.8±9.7   | 0.4±6.8         | 2.8±6.0         | 5.2±6.7          | 3.3±6.9          | 0.76                                          |
|                                                                          | Eggplant             | 77.1±8.9   | -0.5±4.9        | 1.0±5.0         | 3.5±5.6          | 3.0±7.2          |                                               |

Online Supporting Material

|                                                                                      |          |            |          |         |          |          |      |
|--------------------------------------------------------------------------------------|----------|------------|----------|---------|----------|----------|------|
| Home DBP<br>in the evening<br>(mmHg)                                                 | $p^a$    | 0.54       | 0.51     | 0.15    | 0.24     | 0.85     |      |
| Home SBP<br>in the evening in<br>participants with<br>normal-high BP<br>(mmHg)       | Placebo  | 122.7±10.8 | 2.5±8.4  | 3.8±8.1 | 8.1±10.8 | 6.9±11.8 | 0.86 |
|                                                                                      | Eggplant | 124.2±10.6 | -0.8±6.6 | 1.7±7.3 | 5.2±7.2  | 4.4±10.4 |      |
|                                                                                      | $p^a$    | 0.61       | 0.12     | 0.31    | 0.25     | 0.41     |      |
| Home DBP<br>in the evening in<br>participants with<br>normal-high BP<br>(mmHg)       | Placebo  | 72.1±8.8   | 2.7±6.6  | 4.1±5.9 | 6.6±6.7  | 4.2±7.2  | 0.90 |
|                                                                                      | Eggplant | 75.0±8.6   | -0.6±4.9 | 0.6±5.2 | 3.8±4.6  | 3.1±8.1  |      |
|                                                                                      | $p^a$    | 0.23       | 0.044*   | 0.029*  | 0.083    | 0.93     |      |
| Home SBP<br>in the evening in<br>participants with<br>grade 1 hypertension<br>(mmHg) | Placebo  | 133.7±10.7 | -4.3±6.8 | 4.2±9.3 | 3.1±11.3 | 3.7±9.9  | 0.70 |
|                                                                                      | Eggplant | 138.7±9.7  | -1.0±8.9 | 3.4±7.9 | 3.4±13.5 | 1.9±13.5 |      |
|                                                                                      | $p^a$    | 0.27       | 0.31     | 0.82    | 0.96     | 0.64     |      |
| Home DBP<br>in the evening in<br>participants with<br>grade 1 hypertension<br>(mmHg) | Placebo  | 82.2±7.9   | -3.6±5.2 | 0.8±5.7 | 2.8±6.2  | 1.8±6.1  | 0.54 |
|                                                                                      | Eggplant | 83.6±7.0   | -0.2±5.0 | 2.2±4.3 | 2.7±8.1  | 2.5±3.6  |      |
|                                                                                      | $p^a$    | 0.69       | 0.13     | 0.52    | 0.97     | 0.75     |      |

Values are shown as mean ± standard deviation.  $p^a$ : Student's *t*-test was performed.  $p^b$ : repeated-measure analysis of variance was performed. \* $p < 0.05$ , \*\* $p < 0.01$  vs. placebo group.

ΔWeek 4: changes in values from baseline to week 4; ΔWeek 8: changes in values from baseline to week 8; ΔWeek 12: changes in values from baseline to week 12; ΔWeek 16: changes in values from baseline to four weeks after the end of ingestion. BP: blood pressure; SBP: systolic blood pressure; DBP: diastolic blood pressure.

**Table S2.** Blood pressure (measured value)

|                                                                        |                      | Week 0     | Week 4               | Week 8                | Week 12             | Week 16             | <i>time x food<br/>interaction, p<sup>d</sup></i> |
|------------------------------------------------------------------------|----------------------|------------|----------------------|-----------------------|---------------------|---------------------|---------------------------------------------------|
| Hospital SBP<br>(mmHg)                                                 | Placebo              | 134.1±14.0 | 131.4±12.5           | 133.2±12.3            | 135.1±12.2          | 132.2±14.0          |                                                   |
|                                                                        | Eggplant             | 131.8±10.6 | 132.2±14.6           | 128.9±12.0            | 130.0±9.6           | 131.1±12.5          |                                                   |
|                                                                        | <i>p<sup>a</sup></i> | 0.43       | 0.79                 | 0.13                  | 0.046*              | 0.70                | 0.018*                                            |
|                                                                        | <i>p<sup>b</sup></i> | -          | 0.12                 | 0.63                  | 0.58                | 0.36                |                                                   |
|                                                                        | <i>p<sup>c</sup></i> | -          | 0.87                 | 0.089                 | 0.24                | 0.72                |                                                   |
| Hospital DBP<br>(mmHg)                                                 | Placebo              | 83.5±10.4  | 83.8±9.0             | 85.5±8.0              | 84.7±9.7            | 84.4±10.0           |                                                   |
|                                                                        | Eggplant             | 83.0±8.5   | 83.2±10.7            | 81.7±10.5             | 82.4±9.0            | 83.5±8.6            |                                                   |
|                                                                        | <i>p<sup>a</sup></i> | 0.80       | 0.77                 | 0.075                 | 0.29                | 0.69                | 0.13                                              |
|                                                                        | <i>p<sup>b</sup></i> | -          | 0.75                 | 0.054                 | 0.18                | 0.50                |                                                   |
|                                                                        | <i>p<sup>c</sup></i> | -          | 0.86                 | 0.21                  | 0.60                | 0.65                |                                                   |
| Hospital SBP in<br>participants with<br>normal-high BP<br>(mmHg)       | Placebo              | 125.5±9.1  | 125.8±10.2           | 128.1±9.8             | 129.5±10.4          | 127.8±11.2          |                                                   |
|                                                                        | Eggplant             | 127.1±6.8  | 127.9±13.4           | 125.0±9.8             | 127.6±9.1           | 128.8±11.3          |                                                   |
|                                                                        | <i>p<sup>a</sup></i> | 0.48       | 0.54                 | 0.27                  | 0.47                | 0.74                | 0.14                                              |
|                                                                        | <i>p<sup>b</sup></i> | -          | 0.89                 | 0.29                  | 0.11                | 0.34                |                                                   |
|                                                                        | <i>p<sup>c</sup></i> | -          | 0.77                 | 0.30                  | 0.76                | 0.45                |                                                   |
| Hospital DBP in<br>participants with<br>normal-high BP<br>(mmHg)       | Placebo              | 77.0±5.6   | 79.5±6.3             | 81.8±5.6              | 79.3±6.6            | 80.3±8.3            |                                                   |
|                                                                        | Eggplant             | 80.1±6.4   | 80.6±9.9             | 79.3±9.7              | 81.0±8.4            | 82.0±8.3            |                                                   |
|                                                                        | <i>p<sup>a</sup></i> | 0.069      | 0.62                 | 0.25                  | 0.43                | 0.44                | 0.043*                                            |
|                                                                        | <i>p<sup>b</sup></i> | -          | 0.033 <sup>#</sup>   | 0.000021 <sup>#</sup> | 0.034 <sup>#</sup>  | 0.031 <sup>#</sup>  |                                                   |
|                                                                        | <i>p<sup>c</sup></i> | -          | 0.69                 | 0.47                  | 0.42                | 0.17                |                                                   |
| Hospital SBP in<br>participants with<br>grade 1 hypertension<br>(mmHg) | Placebo              | 149.0±5.9  | 140.9±10.2           | 142.1±11.2            | 144.7±8.5           | 140.0±15.4          |                                                   |
|                                                                        | Eggplant             | 146.1±5.8  | 145.1±10.0           | 140.4±10.9            | 137.1±7.4           | 138.0±14.3          |                                                   |
|                                                                        | <i>p<sup>a</sup></i> | 0.26       | 0.34                 | 0.73                  | 0.037*              | 0.75                | 0.028*                                            |
|                                                                        | <i>p<sup>b</sup></i> | -          | 0.00014 <sup>#</sup> | 0.0053 <sup>#</sup>   | 0.047 <sup>#</sup>  | 0.011 <sup>#</sup>  |                                                   |
|                                                                        | <i>p<sup>c</sup></i> | -          | 0.74                 | 0.15                  | 0.0044 <sup>#</sup> | 0.096               |                                                   |
| Hospital DBP in<br>participants with<br>grade 1 hypertension<br>(mmHg) | Placebo              | 94.8±5.9   | 91.4±8.0             | 92.1±7.5              | 94.1±6.6            | 91.5±8.9            |                                                   |
|                                                                        | Eggplant             | 91.7±8.5   | 90.9±9.6             | 89.1±9.7              | 86.8±9.9            | 87.9±8.3            |                                                   |
|                                                                        | <i>p<sup>a</sup></i> | 0.30       | 0.89                 | 0.41                  | 0.041*              | 0.34                | 0.079                                             |
|                                                                        | <i>p<sup>b</sup></i> | -          | 0.045 <sup>#</sup>   | 0.14                  | 0.65                | 0.11                |                                                   |
|                                                                        | <i>p<sup>c</sup></i> | -          | 0.73                 | 0.27                  | 0.0081 <sup>#</sup> | 0.0095 <sup>#</sup> |                                                   |
| Home SBP<br>in the morning<br>(mmHg)                                   | Placebo              | 131.5±12.7 | 131.1±11.5           | 133.4±12.8            | 135.2±11.5          | 132.8±13.6          |                                                   |
|                                                                        | Eggplant             | 133.6±14.1 | 128.7±12.0           | 132.6±11.5            | 134.7±14.8          | 134.9±13.3          |                                                   |
|                                                                        | <i>p<sup>a</sup></i> | 0.49       | 0.38                 | 0.78                  | 0.87                | 0.50                | 0.54                                              |
|                                                                        | <i>p<sup>b</sup></i> | -          | 0.78                 | 0.11                  | 0.0084 <sup>#</sup> | 0.28                |                                                   |
|                                                                        | <i>p<sup>c</sup></i> | -          | 0.0015 <sup>#</sup>  | 0.50                  | 0.42                | 0.42                |                                                   |
| Home DBP<br>in the morning<br>(mmHg)                                   | Placebo              | 81.2±10.6  | 81.7±9.3             | 83.0±10.4             | 83.8±9.6            | 83.1±10.3           |                                                   |
|                                                                        | Eggplant             | 83.1±9.8   | 80.7±9.5             | 82.6±10.1             | 84.1±9.9            | 83.8±9.9            |                                                   |
|                                                                        | <i>p<sup>a</sup></i> | 0.44       | 0.67                 | 0.89                  | 0.90                | 0.76                | 0.54                                              |
|                                                                        | <i>p<sup>b</sup></i> | -          | 0.63                 | 0.058                 | 0.0098 <sup>#</sup> | 0.032 <sup>#</sup>  |                                                   |
|                                                                        | <i>p<sup>c</sup></i> | -          | 0.014 <sup>#</sup>   | 0.62                  | 0.21                | 0.47                |                                                   |
| Home SBP<br>in the morning in                                          | Placebo              | 127.1±11.0 | 127.7±10.3           | 129.9±11.7            | 131.6±9.7           | 128.0±11.5          | 0.54                                              |
|                                                                        | Eggplant             | 129.6±12.1 | 126.4±12.1           | 130.5±11.8            | 131.9±14.1          | 133.2±14.0          |                                                   |

Online Supporting Material

|                                                                          |          |            |                    |                      |                        |                      |      |
|--------------------------------------------------------------------------|----------|------------|--------------------|----------------------|------------------------|----------------------|------|
| participants with normal-high BP (mmHg)                                  | $p^a$    | 0.44       | 0.67               | 0.85                 | 0.91                   | 0.15                 |      |
|                                                                          | $p^b$    | -          | 0.65               | 0.040 <sup>#</sup>   | 0.0020 <sup>##</sup>   | 0.55                 |      |
|                                                                          | $p^c$    | -          | 0.017 <sup>#</sup> | 0.52                 | 0.12                   | 0.038 <sup>#</sup>   |      |
| Home DBP in the morning in participants with normal-high BP (mmHg)       | Placebo  | 77.3±9.4   | 79.1±9.0           | 79.3±9.1             | 80.6±8.2               | 79.6±9.2             |      |
|                                                                          | Eggplant | 81.3±8.4   | 79.5±9.6           | 81.3±10.2            | 82.6±9.9               | 82.7±10.4            |      |
|                                                                          | $p^a$    | 0.12       | 0.87               | 0.45                 | 0.44                   | 0.25                 | 0.31 |
|                                                                          | $p^b$    | -          | 0.10               | 0.12                 | 0.0083 <sup>##</sup>   | 0.086                |      |
|                                                                          | $p^c$    | -          | 0.033 <sup>#</sup> | 0.98                 | 0.11                   | 0.17                 |      |
| Home SBP in the morning in participants with grade 1 hypertension (mmHg) | Placebo  | 139.0±12.2 | 137.0±11.6         | 139.5±12.7           | 141.5±12.1             | 141.2±13.0           |      |
|                                                                          | Eggplant | 145.4±13.7 | 135.8±8.5          | 139.0±7.8            | 143.0±14.3             | 140.0±9.8            |      |
|                                                                          | $p^a$    | 0.24       | 0.79               | 0.91                 | 0.79                   | 0.81                 | 0.81 |
|                                                                          | $p^b$    | -          | 0.42               | 0.83                 | 0.41                   | 0.36                 |      |
|                                                                          | $p^c$    | -          | 0.038 <sup>#</sup> | 0.067                | 0.51                   | 0.19                 |      |
| Home DBP in the morning in participants with grade 1 hypertension (mmHg) | Placebo  | 88.0±9.2   | 86.2±8.3           | 89.3±9.5             | 89.2±9.5               | 89.2±9.3             |      |
|                                                                          | Eggplant | 88.4±12.2  | 84.6±8.7           | 86.6±9.0             | 88.6±8.9               | 87.1±8.0             |      |
|                                                                          | $p^a$    | 0.91       | 0.66               | 0.50                 | 0.87                   | 0.58                 | 0.70 |
|                                                                          | $p^b$    | -          | 0.26               | 0.32                 | 0.44                   | 0.16                 |      |
|                                                                          | $p^c$    | -          | 0.20               | 0.33                 | 0.95                   | 0.66                 |      |
| Home SBP in the evening (mmHg)                                           | Placebo  | 126.7±11.9 | 126.7±10.4         | 130.7±12.7           | 133.0±12.6             | 132.5±13.3           |      |
|                                                                          | Eggplant | 127.8±12.1 | 127.0±13.2         | 129.9±13.7           | 132.6±15.5             | 131.6±14.3           |      |
|                                                                          | $p^a$    | 0.69       | 0.92               | 0.80                 | 0.89                   | 0.78                 | 0.88 |
|                                                                          | $p^b$    | -          | 0.99               | 0.0044 <sup>##</sup> | 0.00082 <sup>##</sup>  | 0.0021 <sup>##</sup> |      |
|                                                                          | $p^c$    | -          | 0.47               | 0.093                | 0.0032 <sup>##</sup>   | 0.030 <sup>#</sup>   |      |
| Home DBP in the evening (mmHg)                                           | Placebo  | 75.8±9.7   | 76.2±8.0           | 78.7±8.3             | 81.0±9.6               | 79.1±9.8             |      |
|                                                                          | Eggplant | 77.1±8.9   | 76.6±10.3          | 78.1±11.1            | 80.7±11.2              | 80.1±11.4            |      |
|                                                                          | $p^a$    | 0.54       | 0.84               | 0.81                 | 0.88                   | 0.68                 | 0.76 |
|                                                                          | $p^b$    | -          | 0.71               | 0.0040 <sup>##</sup> | 0.000012 <sup>##</sup> | 0.0038 <sup>##</sup> |      |
|                                                                          | $p^c$    | -          | 0.56               | 0.24                 | 0.00054 <sup>##</sup>  | 0.018 <sup>#</sup>   |      |
| Home SBP in the evening in participants with normal-high BP (mmHg)       | Placebo  | 122.7±10.8 | 125.1±9.1          | 126.5±10.5           | 130.8±10.5             | 129.6±13.2           |      |
|                                                                          | Eggplant | 124.2±10.6 | 123.4±12.6         | 125.9±11.5           | 129.4±13.4             | 128.5±13.2           |      |
|                                                                          | $p^a$    | 0.61       | 0.56               | 0.83                 | 0.67                   | 0.78                 | 0.86 |
|                                                                          | $p^b$    | -          | 0.15               | 0.023 <sup>#</sup>   | 0.00077 <sup>##</sup>  | 0.0065 <sup>##</sup> |      |
|                                                                          | $p^c$    | -          | 0.52               | 0.24                 | 0.00090 <sup>##</sup>  | 0.039 <sup>#</sup>   |      |
| Home DBP in the evening in participants with normal-high BP (mmHg)       | Placebo  | 72.1±8.8   | 74.8±7.1           | 76.2±7.9             | 78.7±8.4               | 76.3±8.9             |      |
|                                                                          | Eggplant | 75.0±8.6   | 74.4±10.2          | 75.6±10.5            | 78.8±10.6              | 78.1±11.5            |      |
|                                                                          | $p^a$    | 0.23       | 0.87               | 0.82                 | 0.97                   | 0.52                 | 0.90 |
|                                                                          | $p^b$    | -          | 0.047 <sup>#</sup> | 0.0017 <sup>##</sup> | 0.000035 <sup>##</sup> | 0.0068 <sup>##</sup> |      |
|                                                                          | $p^c$    | -          | 0.55               | 0.55                 | 0.00021 <sup>##</sup>  | 0.054                |      |
| Home SBP in the evening in participants with grade 1 hypertension (mmHg) | Placebo  | 133.7±10.7 | 129.4±12.3         | 138.0±13.3           | 136.8±15.1             | 137.5±12.3           |      |
|                                                                          | Eggplant | 138.7±9.7  | 137.8±8.1          | 142.1±13.1           | 142.1±18.1             | 140.6±14.0           |      |
|                                                                          | $p^a$    | 0.27       | 0.085              | 0.46                 | 0.45                   | 0.57                 | 0.70 |
|                                                                          | $p^b$    | -          | 0.028 <sup>#</sup> | 0.10                 | 0.31                   | 0.17                 |      |
|                                                                          | $p^c$    | -          | 0.75               | 0.24                 | 0.47                   | 0.53                 |      |
| Home DBP in the evening in                                               | Placebo  | 82.2±7.9   | 78.6±9.2           | 83.0±7.5             | 85.1±10.6              | 84.0±9.4             |      |
|                                                                          | Eggplant | 83.6±7.0   | 83.4±7.6           | 85.7±9.7             | 86.3±11.9              | 86.0±8.9             | 0.54 |

## Online Supporting Material

|                                                     |       |      |                    |      |       |       |
|-----------------------------------------------------|-------|------|--------------------|------|-------|-------|
| participants with<br>grade 1 hypertension<br>(mmHg) | $p^a$ | 0.69 | 0.21               | 0.45 | 0.80  | 0.61  |
|                                                     | $p^b$ | -    | 0.017 <sup>#</sup> | 0.62 | 0.099 | 0.29  |
|                                                     | $p^c$ | -    | 0.91               | 0.17 | 0.35  | 0.073 |

Values are shown as mean  $\pm$  standard deviation.  $p^{a-c}$ : Student's  $t$ -test was performed.  $p^d$ : repeated-measure analysis of variance was performed. \* $p < 0.05$ , \*\* $p < 0.01$  vs. placebo group. # $p < 0.05$ , ## $p < 0.01$  vs. week 0. BP: blood pressure; SBP: systolic blood pressure; DBP: diastolic blood pressure.

**Table S3.** VAS scores indicating stress and POMS-2 scores indicating psychological state (measured value)

|                                                                  |                      | Week 0    | Week 4             | Week 8               | Week 12              | Week 16            | <i>time x food interaction, p<sup>d</sup></i> |
|------------------------------------------------------------------|----------------------|-----------|--------------------|----------------------|----------------------|--------------------|-----------------------------------------------|
| Stress before UKT (mm)                                           | Placebo              | 50.6±18.7 | 52.0±21.3          | 57.0±19.0            | 54.8±20.6            | 54.2±20.7          | 0.30                                          |
|                                                                  | Eggplant             | 54.7±17.1 | 57.9±16.7          | 57.5±16.6            | 55.3±17.3            | 54.9±17.8          |                                               |
|                                                                  | <i>p<sup>a</sup></i> | 0.32      | 0.18               | 0.92                 | 0.92                 | 0.86               |                                               |
|                                                                  | <i>p<sup>b</sup></i> | -         | 0.57               | 0.012 <sup>†</sup>   | 0.13                 | 0.19               |                                               |
|                                                                  | <i>p<sup>c</sup></i> | -         | 0.39               | 0.46                 | 0.88                 | 0.95               |                                               |
| Stress after UKT (mm)                                            | Placebo              | 32.9±22.4 | 33.1±20.6          | 35.1±20.8            | 39.4±22.6            | 33.4±23.0          | 0.47                                          |
|                                                                  | Eggplant             | 28.8±17.0 | 33.6±18.2          | 33.2±17.6            | 34.8±20.7            | 35.4±19.2          |                                               |
|                                                                  | <i>p<sup>a</sup></i> | 0.36      | 0.92               | 0.66                 | 0.36                 | 0.69               |                                               |
|                                                                  | <i>p<sup>b</sup></i> | -         | 0.93               | 0.37                 | 0.061                | 0.87               |                                               |
|                                                                  | <i>p<sup>c</sup></i> | -         | 0.18               | 0.19                 | 0.13                 | 0.091              |                                               |
| Stress before UKT in participants with normal-high BP (mm)       | Placebo              | 52.4±17.1 | 51.8±18.6          | 55.8±15.8            | 56.3±17.7            | 53.2±18.5          | 0.27                                          |
|                                                                  | Eggplant             | 56.6±18.7 | 60.2±17.5          | 59.4±17.0            | 56.6±18.3            | 55.6±18.4          |                                               |
|                                                                  | <i>p<sup>a</sup></i> | 0.40      | 0.097              | 0.43                 | 0.95                 | 0.65               |                                               |
|                                                                  | <i>p<sup>b</sup></i> | -         | 0.86               | 0.22                 | 0.27                 | 0.81               |                                               |
|                                                                  | <i>p<sup>c</sup></i> | -         | 0.44               | 0.53                 | 0.99                 | 0.82               |                                               |
| Stress after UKT in participants with normal-high BP (mm)        | Placebo              | 37.6±22.5 | 32.5±19.7          | 33.2±19.9            | 38.5±22.1            | 34.2±23.5          | 0.73                                          |
|                                                                  | Eggplant             | 29.9±18.1 | 32.7±19.5          | 32.8±18.2            | 34.9±21.7            | 34.4±18.6          |                                               |
|                                                                  | <i>p<sup>a</sup></i> | 0.18      | 0.96               | 0.94                 | 0.56                 | 0.97               |                                               |
|                                                                  | <i>p<sup>b</sup></i> | -         | 0.10               | 0.069                | 0.82                 | 0.44               |                                               |
|                                                                  | <i>p<sup>c</sup></i> | -         | 0.53               | 0.49                 | 0.32                 | 0.34               |                                               |
| Stress before UKT in participants with grade 1 hypertension (mm) | Placebo              | 47.4±21.4 | 52.3±25.9          | 59.1±24.1            | 52.3±25.4            | 55.8±24.6          | 0.62                                          |
|                                                                  | Eggplant             | 49.1±9.5  | 51.0±11.9          | 51.7±15.0            | 51.2±14.3            | 53.1±16.6          |                                               |
|                                                                  | <i>p<sup>a</sup></i> | 0.79      | 0.87               | 0.41                 | 0.91                 | 0.78               |                                               |
|                                                                  | <i>p<sup>b</sup></i> | -         | 0.19               | 0.023 <sup>†</sup>   | 0.31                 | 0.051              |                                               |
|                                                                  | <i>p<sup>c</sup></i> | -         | 0.74               | 0.71                 | 0.76                 | 0.60               |                                               |
| Stress after UKT in participants with grade 1 hypertension (mm)  | Placebo              | 24.9±20.6 | 34.3±22.8          | 38.5±22.6            | 40.9±24.2            | 32.1±22.9          | 0.46                                          |
|                                                                  | Eggplant             | 25.3±13.5 | 36.1±14.3          | 34.3±16.4            | 34.4±18.5            | 38.3±21.8          |                                               |
|                                                                  | <i>p<sup>a</sup></i> | 0.95      | 0.83               | 0.64                 | 0.50                 | 0.52               |                                               |
|                                                                  | <i>p<sup>b</sup></i> | -         | 0.018 <sup>†</sup> | 0.0025 <sup>##</sup> | 0.0072 <sup>##</sup> | 0.041 <sup>†</sup> |                                               |
|                                                                  | <i>p<sup>c</sup></i> | -         | 0.038 <sup>†</sup> | 0.094                | 0.11                 | 0.072              |                                               |
| Anger-Hostility                                                  | Placebo              | 9.0±7.0   | 8.6±6.4            | 9.0±7.2              | 8.3±7.2              | 8.0±6.1            | 0.51                                          |
|                                                                  | Eggplant             | 7.6±6.2   | 7.2±6.5            | 7.3±7.3              | 5.8±5.6              | 6.9±7.8            |                                               |
|                                                                  | <i>p<sup>a</sup></i> | 0.36      | 0.33               | 0.32                 | 0.085                | 0.52               |                                               |
|                                                                  | <i>p<sup>b</sup></i> | -         | 0.71               | 0.98                 | 0.49                 | 0.27               |                                               |
|                                                                  | <i>p<sup>c</sup></i> | -         | 0.56               | 0.72                 | 0.041 <sup>†</sup>   | 0.48               |                                               |
| Anger-Hostility in participants with normal-high BP              | Placebo              | 9.2±7.1   | 8.9±6.2            | 9.5±7.0              | 9.6±7.3              | 8.6±5.9            | 0.23                                          |
|                                                                  | Eggplant             | 7.7±6.7   | 7.2±6.7            | 7.4±7.5              | 5.8±5.6              | 7.0±8.3            |                                               |
|                                                                  | <i>p<sup>a</sup></i> | 0.41      | 0.34               | 0.29                 | 0.040 <sup>*</sup>   | 0.42               |                                               |
|                                                                  | <i>p<sup>b</sup></i> | -         | 0.79               | 0.81                 | 0.79                 | 0.63               |                                               |
|                                                                  | <i>p<sup>c</sup></i> | -         | 0.50               | 0.66                 | 0.072                | 0.48               |                                               |

Online Supporting Material

|                                                                  |                       |          |                    |          |                       |                      |       |
|------------------------------------------------------------------|-----------------------|----------|--------------------|----------|-----------------------|----------------------|-------|
| Anger-Hostility in participants with grade 1 hypertension        | Placebo               | 8.5±7.2  | 8.1±6.8            | 8.1±7.6  | 6.2±6.6               | 6.9±6.5              | 0.85  |
|                                                                  | Eggplant              | 7.2±4.5  | 7.1±6.4            | 7.1±7.4  | 5.9±5.8               | 6.8±6.5              |       |
|                                                                  | <i>p</i> <sup>a</sup> | 0.65     | 0.72               | 0.77     | 0.91                  | 0.98                 |       |
|                                                                  | <i>p</i> <sup>b</sup> | -        | 0.80               | 0.67     | 0.0103 <sup>‡</sup>   | 0.12                 |       |
|                                                                  | <i>p</i> <sup>c</sup> | -        | 0.95               | 0.96     | 0.37                  | 0.83                 |       |
| Confusion-Bewilderment                                           | Placebo               | 13.2±4.3 | 12.3±4.5           | 12.3±4.9 | 12.3±5.0              | 12.5±5.7             | 0.068 |
|                                                                  | Eggplant              | 12.3±4.6 | 10.8±4.8           | 11.6±4.6 | 9.9±4.1               | 11.4±4.8             |       |
|                                                                  | <i>p</i> <sup>a</sup> | 0.37     | 0.14               | 0.56     | 0.026                 | 0.37                 |       |
|                                                                  | <i>p</i> <sup>b</sup> | -        | 0.10               | 0.072    | 0.11                  | 0.22                 |       |
|                                                                  | <i>p</i> <sup>c</sup> | -        | 0.020 <sup>‡</sup> | 0.35     | 0.00080 <sup>‡#</sup> | 0.15                 |       |
| Confusion-Bewilderment in participants with normal-high BP       | Placebo               | 13.7±4.0 | 12.8±3.9           | 12.9±4.5 | 13.4±4.5              | 13.8±5.4             | 0.18  |
|                                                                  | Eggplant              | 12.1±4.7 | 10.9±5.0           | 11.8±4.6 | 10.5±4.3              | 12.0±5.1             |       |
|                                                                  | <i>p</i> <sup>a</sup> | 0.19     | 0.11               | 0.40     | 0.021*                | 0.22                 |       |
|                                                                  | <i>p</i> <sup>b</sup> | -        | 0.19               | 0.19     | 0.68                  | 0.96                 |       |
|                                                                  | <i>p</i> <sup>c</sup> | -        | 0.063              | 0.65     | 0.017 <sup>‡</sup>    | 0.76                 |       |
| Confusion-Bewilderment in participants with grade 1 hypertension | Placebo               | 12.4±4.8 | 11.4±5.6           | 11.2±5.4 | 10.4±5.3              | 10.3±5.6             | 0.15  |
|                                                                  | Eggplant              | 12.9±4.7 | 10.4±4.3           | 11.1±4.7 | 8.2±3.0               | 9.7±3.6              |       |
|                                                                  | <i>p</i> <sup>a</sup> | 0.81     | 0.66               | 0.97     | 0.21                  | 0.78                 |       |
|                                                                  | <i>p</i> <sup>b</sup> | -        | 0.35               | 0.24     | 0.0059 <sup>‡#</sup>  | 0.0053 <sup>‡#</sup> |       |
|                                                                  | <i>p</i> <sup>c</sup> | -        | 0.19               | 0.41     | 0.019 <sup>‡</sup>    | 0.088                |       |
| Depression-Dejection                                             | Placebo               | 9.5±8.3  | 9.0±7.7            | 9.0±8.0  | 8.0±7.3               | 7.8±7.7              | 0.84  |
|                                                                  | Eggplant              | 7.2±6.3  | 6.7±7.1            | 6.9±6.3  | 5.4±5.5               | 6.3±7.0              |       |
|                                                                  | <i>p</i> <sup>a</sup> | 0.18     | 0.17               | 0.22     | 0.085                 | 0.38                 |       |
|                                                                  | <i>p</i> <sup>b</sup> | -        | 0.56               | 0.55     | 0.18                  | 0.17                 |       |
|                                                                  | <i>p</i> <sup>c</sup> | -        | 0.53               | 0.75     | 0.042 <sup>‡</sup>    | 0.21                 |       |
| Depression-Dejection in participants with normal-high BP         | Placebo               | 9.5±8.7  | 9.4±7.2            | 9.8±7.3  | 8.4±6.5               | 8.2±6.7              | 0.94  |
|                                                                  | Eggplant              | 7.5±6.9  | 5.9±6.4            | 6.2±5.6  | 5.2±5.5               | 6.7±7.4              |       |
|                                                                  | <i>p</i> <sup>a</sup> | 0.35     | 0.067              | 0.048*   | 0.061                 | 0.43                 |       |
|                                                                  | <i>p</i> <sup>b</sup> | -        | 0.91               | 0.79     | 0.48                  | 0.46                 |       |
|                                                                  | <i>p</i> <sup>c</sup> | -        | 0.022 <sup>‡</sup> | 0.080    | 0.041 <sup>‡</sup>    | 0.36                 |       |
| Depression-Dejection in participants with grade 1 hypertension   | Placebo               | 9.5±7.8  | 8.3±8.8            | 7.5±9.2  | 7.3±8.8               | 7.0±9.4              | 0.18  |
|                                                                  | Eggplant              | 6.4±4.1  | 9.0±8.9            | 9.2±7.9  | 5.8±6.0               | 5.1±5.7              |       |
|                                                                  | <i>p</i> <sup>a</sup> | 0.30     | 0.86               | 0.64     | 0.66                  | 0.59                 |       |
|                                                                  | <i>p</i> <sup>b</sup> | -        | 0.45               | 0.19     | 0.14                  | 0.17                 |       |
|                                                                  | <i>p</i> <sup>c</sup> | -        | 0.39               | 0.30     | 0.69                  | 0.38                 |       |
| Fatigue-Inertia                                                  | Placebo               | 7.5±5.1  | 7.1±4.4            | 6.9±5.0  | 6.1±4.2               | 6.6±5.2              | 0.80  |
|                                                                  | Eggplant              | 7.2±4.1  | 7.1±4.5            | 6.8±3.8  | 5.7±4.0               | 6.8±4.3              |       |
|                                                                  | <i>p</i> <sup>a</sup> | 0.80     | 0.99               | 0.92     | 0.63                  | 0.84                 |       |
|                                                                  | <i>p</i> <sup>b</sup> | -        | 0.57               | 0.15     | 0.022 <sup>‡</sup>    | 0.052                |       |
|                                                                  | <i>p</i> <sup>c</sup> | -        | 0.94               | 0.60     | 0.025 <sup>‡</sup>    | 0.52                 |       |
| Fatigue-Inertia in participants with normal-high BP              | Placebo               | 8.3±5.4  | 8.1±4.0            | 8.3±4.8  | 7.3±4.0               | 8.1±5.4              | 0.75  |
|                                                                  | Eggplant              | 7.1±4.2  | 7.0±4.4            | 6.6±3.7  | 5.7±4.4               | 6.9±4.6              |       |
|                                                                  | <i>p</i> <sup>a</sup> | 0.37     | 0.36               | 0.17     | 0.17                  | 0.39                 |       |
|                                                                  | <i>p</i> <sup>b</sup> | -        | 0.80               | 1.0      | 0.24                  | 0.73                 |       |

Online Supporting Material

|                                                           |                       |          |                     |                    |                    |                     |      |
|-----------------------------------------------------------|-----------------------|----------|---------------------|--------------------|--------------------|---------------------|------|
|                                                           | <i>p</i> <sup>c</sup> | -        | 0.90                | 0.47               | 0.039 <sup>#</sup> | 0.76                |      |
| Fatigue-Inertia in participants with grade 1 hypertension | Placebo               | 6.1±4.5  | 5.5±4.8             | 4.5±4.5            | 4.1±3.8            | 3.9±3.5             |      |
|                                                           | Eggplant              | 7.6±3.8  | 7.6±4.8             | 7.3±4.1            | 5.6±2.9            | 6.4±3.3             |      |
|                                                           | <i>p</i> <sup>a</sup> | 0.42     | 0.33                | 0.14               | 0.32               | 0.098               | 0.61 |
|                                                           | <i>p</i> <sup>b</sup> | -        | 0.51                | 0.015 <sup>‡</sup> | 0.012 <sup>‡</sup> | 0.0079 <sup>#</sup> |      |
|                                                           | <i>p</i> <sup>c</sup> | -        | 1.00                | 0.93               | 0.32               | 0.58                |      |
| Tension-Anxiety                                           | Placebo               | 14.7±8.0 | 13.6±6.6            | 13.4±6.5           | 13.2±7.5           | 13.2±6.9            |      |
|                                                           | Eggplant              | 13.4±5.4 | 11.4±5.1            | 12.7±5.0           | 11.1±4.3           | 12.4±6.2            |      |
|                                                           | <i>p</i> <sup>a</sup> | 0.40     | 0.12                | 0.62               | 0.13               | 0.62                | 0.36 |
|                                                           | <i>p</i> <sup>b</sup> | -        | 0.087               | 0.11               | 0.18               | 0.10                |      |
|                                                           | <i>p</i> <sup>c</sup> | -        | 0.038 <sup>‡</sup>  | 0.52               | 0.035 <sup>‡</sup> | 0.42                |      |
| Tension-Anxiety in participants with normal-high BP       | Placebo               | 15.3±8.6 | 14.1±7.0            | 14.0±6.3           | 13.9±7.8           | 13.6±6.6            |      |
|                                                           | Eggplant              | 13.1±5.4 | 11.0±5.2            | 12.9±5.1           | 11.1±4.5           | 12.5±7.0            |      |
|                                                           | <i>p</i> <sup>a</sup> | 0.26     | 0.077               | 0.47               | 0.13               | 0.56                | 0.40 |
|                                                           | <i>p</i> <sup>b</sup> | -        | 0.19                | 0.20               | 0.36               | 0.19                |      |
|                                                           | <i>p</i> <sup>c</sup> | -        | 0.0093 <sup>#</sup> | 0.84               | 0.075              | 0.69                |      |
| Tension-Anxiety in participants with grade 1 hypertension | Placebo               | 13.7±7.0 | 12.7±5.8            | 12.3±6.9           | 12.1±7.0           | 12.5±7.4            |      |
|                                                           | Eggplant              | 14.4±5.7 | 12.7±4.7            | 12.2±5.3           | 11.0±3.6           | 12.2±3.0            |      |
|                                                           | <i>p</i> <sup>a</sup> | 0.80     | 1.00                | 0.99               | 0.61               | 0.91                | 0.79 |
|                                                           | <i>p</i> <sup>b</sup> | -        | 0.27                | 0.36               | 0.26               | 0.34                |      |
|                                                           | <i>p</i> <sup>c</sup> | -        | 0.58                | 0.52               | 0.27               | 0.39                |      |
| Vigor-Activity                                            | Placebo               | 12.7±6.5 | 11.9±5.7            | 12.4±6.5           | 12.4±6.3           | 11.9±6.7            |      |
|                                                           | Eggplant              | 13.1±7.1 | 13.4±7.3            | 12.9±7.4           | 12.6±7.5           | 12.3±7.3            |      |
|                                                           | <i>p</i> <sup>a</sup> | 0.82     | 0.31                | 0.75               | 0.89               | 0.82                | 0.41 |
|                                                           | <i>p</i> <sup>b</sup> | -        | 0.19                | 0.54               | 0.70               | 0.33                |      |
|                                                           | <i>p</i> <sup>c</sup> | -        | 0.69                | 0.85               | 0.55               | 0.28                |      |
| Vigor-Activity in participants with normal-high BP        | Placebo               | 11.8±5.1 | 11.3±5.4            | 11.9±5.7           | 11.8±5.3           | 11.4±6.1            |      |
|                                                           | Eggplant              | 13.9±6.8 | 13.3±7.6            | 12.7±7.2           | 12.7±8.0           | 12.8±7.4            |      |
|                                                           | <i>p</i> <sup>a</sup> | 0.22     | 0.28                | 0.66               | 0.61               | 0.47                | 0.60 |
|                                                           | <i>p</i> <sup>b</sup> | -        | 0.60                | 0.91               | 0.97               | 0.74                |      |
|                                                           | <i>p</i> <sup>c</sup> | -        | 0.41                | 0.12               | 0.19               | 0.23                |      |
| Vigor-Activity in participants with grade 1 hypertension  | Placebo               | 14.3±8.3 | 12.7±6.4            | 13.3±7.9           | 13.5±7.7           | 12.7±7.7            |      |
|                                                           | Eggplant              | 10.7±7.8 | 13.6±6.7            | 13.7±8.5           | 12.3±6.3           | 10.8±7.5            |      |
|                                                           | <i>p</i> <sup>a</sup> | 0.30     | 0.77                | 0.92               | 0.70               | 0.55                | 0.54 |
|                                                           | <i>p</i> <sup>b</sup> | -        | 0.12                | 0.18               | 0.58               | 0.21                |      |
|                                                           | <i>p</i> <sup>c</sup> | -        | 0.22                | 0.24               | 0.24               | 0.93                |      |
| Friendliness                                              | Placebo               | 10.7±4.1 | 10.8±3.2            | 11.2±3.7           | 10.3±3.5           | 9.6±3.2             |      |
|                                                           | Eggplant              | 10.6±4.4 | 10.7±4.1            | 10.5±4.4           | 10.1±3.8           | 9.9±4.3             |      |
|                                                           | <i>p</i> <sup>a</sup> | 0.98     | 0.92                | 0.44               | 0.81               | 0.75                | 0.54 |
|                                                           | <i>p</i> <sup>b</sup> | -        | 0.78                | 0.28               | 0.56               | 0.063               |      |
|                                                           | <i>p</i> <sup>c</sup> | -        | 0.86                | 0.84               | 0.17               | 0.080               |      |
| Friendliness in participants with normal-high BP          | Placebo               | 10.2±4.0 | 10.8±3.5            | 11.7±3.4           | 10.4±3.4           | 9.6±3.5             |      |
|                                                           | Eggplant              | 11.3±4.1 | 10.9±4.2            | 10.5±4.6           | 10.3±3.6           | 10.3±4.0            | 0.16 |
|                                                           | <i>p</i> <sup>a</sup> | 0.36     | 1.00                | 0.29               | 0.90               | 0.49                |      |



Online Supporting Material

|                                                                |          |           |           |                    |                    |                    |      |
|----------------------------------------------------------------|----------|-----------|-----------|--------------------|--------------------|--------------------|------|
|                                                                | $p^b$    | -         | 0.39      | 0.039 <sup>#</sup> | 0.85               | 0.43               |      |
|                                                                | $p^c$    | -         | 0.40      | 0.23               | 0.029 <sup>#</sup> | 0.096              |      |
| Friendliness in participants with grade 1 hypertension         | Placebo  | 11.4±4.3  | 10.7±2.8  | 10.4±4.0           | 10.2±3.7           | 9.6±2.8            |      |
|                                                                | Eggplant | 8.8±4.9   | 10.3±4.0  | 10.6±3.8           | 9.7±4.6            | 8.6±5.2            |      |
|                                                                | $p^a$    | 0.19      | 0.78      | 0.93               | 0.76               | 0.52               | 0.83 |
|                                                                | $p^b$    | -         | 0.34      | 0.15               | 0.12               | 0.019 <sup>#</sup> |      |
|                                                                | $p^c$    | -         | 0.18      | 0.15               | 0.15               | 0.62               |      |
| TMD score before UKT                                           | Placebo  | 41.1±30.1 | 38.8±26.5 | 38.1±29.1          | 35.6±27.8          | 36.1±29.4          |      |
|                                                                | Eggplant | 34.6±24.2 | 29.8±27.0 | 32.5±23.3          | 25.3±22.4          | 31.6±27.7          |      |
|                                                                | $p^a$    | 0.30      | 0.15      | 0.36               | 0.079              | 0.49               | 0.46 |
|                                                                | $p^b$    | -         | 0.35      | 0.19               | 0.13               | 0.13               |      |
|                                                                | $p^c$    | -         | 0.14      | 0.49               | 0.011 <sup>#</sup> | 0.37               |      |
| TMD score before UKT in participants with normal-high BP       | Placebo  | 44.2±30.7 | 41.9±24.7 | 42.6±27.6          | 40.8±26.2          | 40.9±28.6          |      |
|                                                                | Eggplant | 33.6±26.2 | 28.6±27.3 | 32.2±22.0          | 25.6±23.5          | 32.3±29.9          |      |
|                                                                | $p^a$    | 0.18      | 0.069     | 0.14               | 0.031 <sup>*</sup> | 0.29               | 0.66 |
|                                                                | $p^b$    | -         | 0.50      | 0.60               | 0.52               | 0.50               |      |
|                                                                | $p^c$    | -         | 0.11      | 0.62               | 0.052              | 0.74               |      |
| TMD score before UKT in participants with grade 1 hypertension | Placebo  | 35.8±29.2 | 33.3±29.4 | 30.2±30.7          | 26.5±28.9          | 27.8±30.0          |      |
|                                                                | Eggplant | 37.9±17.9 | 33.2±27.6 | 33.3±28.4          | 24.1±20.2          | 29.4±21.3          |      |
|                                                                | $p^a$    | 0.85      | 0.99      | 0.81               | 0.83               | 0.89               | 0.50 |
|                                                                | $p^b$    | -         | 0.52      | 0.14               | 0.012 <sup>#</sup> | 0.027 <sup>#</sup> |      |
|                                                                | $p^c$    | -         | 0.64      | 0.65               | 0.13               | 0.28               |      |

Values are shown as mean ± standard deviation.  $p^{a-c}$ : Student's *t*-test was performed.  $p^d$ : repeated-measure analysis of variance was performed. \* $p < 0.05$ , \*\* $p < 0.01$  vs. placebo group. # $p < 0.05$ , ## $p < 0.01$  vs. week 0. BP: Blood pressure; TMD: Total Mood Disturbance; UKT: Uchida-Kraepelin Psychodiagnostic Test.

**Table S4.** Changes in VAS and POMS-2 scores from week 0

|                                                                  |                      | Week 0    | ΔWeek 4   | ΔWeek 8   | ΔWeek 12  | ΔWeek 16  | <i>time x food interaction, p<sup>b</sup></i> |
|------------------------------------------------------------------|----------------------|-----------|-----------|-----------|-----------|-----------|-----------------------------------------------|
| Stress before UKT (mm)                                           | Placebo              | 50.6±18.7 | 1.4±15.9  | 6.5±15.7  | 4.2±17.4  | 3.6±17.1  | 0.30                                          |
|                                                                  | Eggplant             | 54.7±17.1 | 3.2±22.4  | 2.8±22.3  | 0.6±21.7  | 0.3±22.3  |                                               |
|                                                                  | <i>p<sup>a</sup></i> | 0.32      | 0.69      | 0.40      | 0.41      | 0.46      |                                               |
| Stress after UKT (mm)                                            | Placebo              | 32.9±22.4 | 0.2±16.1  | 2.2±15.4  | 6.4±21.4  | 0.5±19.5  | 0.47                                          |
|                                                                  | Eggplant             | 28.8±17.0 | 4.8±21.1  | 4.4±19.7  | 6.0±23.1  | 6.6±22.9  |                                               |
|                                                                  | <i>p<sup>a</sup></i> | 0.36      | 0.28      | 0.58      | 0.94      | 0.21      |                                               |
| Stress before UKT in participants with normal-high BP (mm)       | Placebo              | 52.4±17.1 | -0.6±16.9 | 3.5±13.9  | 3.9±17.5  | 0.8±17.9  | 0.27                                          |
|                                                                  | Eggplant             | 56.6±18.7 | 3.7±24.3  | 2.9±23.4  | 0.0±22.5  | -1.0±22.6 |                                               |
|                                                                  | <i>p<sup>a</sup></i> | 0.40      | 0.47      | 0.91      | 0.49      | 0.74      |                                               |
| Stress after UKT in participants with normal-high BP (mm)        | Placebo              | 37.6±22.5 | -5.1±15.2 | -4.4±11.8 | 0.9±20.6  | -3.3±21.9 | 0.73                                          |
|                                                                  | Eggplant             | 29.9±18.1 | 2.8±23.1  | 2.9±21.2  | 5.0±25.4  | 4.5±24.1  |                                               |
|                                                                  | <i>p<sup>a</sup></i> | 0.18      | 0.15      | 0.13      | 0.52      | 0.22      |                                               |
| Stress before UKT in participants with grade 1 hypertension (mm) | Placebo              | 47.4±21.4 | 4.9±13.9  | 11.7±17.8 | 4.9±17.7  | 8.4±15.2  | 0.62                                          |
|                                                                  | Eggplant             | 49.1±9.5  | 1.9±16.6  | 2.6±19.9  | 2.1±20.1  | -4.0±22.2 |                                               |
|                                                                  | <i>p<sup>a</sup></i> | 0.79      | 0.63      | 0.25      | 0.73      | 0.57      |                                               |
| Stress after UKT in participants with grade 1 hypertension (mm)  | Placebo              | 24.9±20.6 | 9.4±13.7  | 13.6±14.3 | 16.0±19.7 | 7.2±12.4  | 0.46                                          |
|                                                                  | Eggplant             | 25.3±13.5 | 10.8±13.0 | 9.0±14.2  | 9.1±15.1  | 13.0±18.9 |                                               |
|                                                                  | <i>p<sup>a</sup></i> | 0.95      | 0.81      | 0.45      | 0.38      | 0.37      |                                               |
| Anger-Hostility                                                  | Placebo              | 9.0±7.0   | -0.3±5.9  | 0.0±4.9   | -0.6±5.6  | -1.0±5.6  | 0.51                                          |
|                                                                  | Eggplant             | 7.6±6.2   | -0.4±4.0  | -0.3±4.1  | -1.8±4.9  | -0.6±5.1  |                                               |
|                                                                  | <i>p<sup>a</sup></i> | 0.36      | 0.97      | 0.79      | 0.35      | 0.77      |                                               |
| Anger-Hostility in participants with normal-high BP              | Placebo              | 9.2±7.1   | -0.3±6.5  | 0.3±5.6   | 0.3±6.6   | -0.6±6.4  | 0.23                                          |
|                                                                  | Eggplant             | 7.7±6.7   | -0.5±3.7  | -0.3±3.5  | -1.9±5.2  | -0.7±4.8  |                                               |
|                                                                  | <i>p<sup>a</sup></i> | 0.41      | 0.93      | 0.66      | 0.18      | 0.97      |                                               |
| Anger-Hostility in participants with grade 1 hypertension        | Placebo              | 8.5±7.2   | -0.3±5.0  | -0.4±3.5  | -2.3±3.0  | -1.6±3.7  | 0.85                                          |
|                                                                  | Eggplant             | 7.2±4.5   | -0.1±5.1  | -0.1±6.1  | -1.3±4.2  | -0.4±6.0  |                                               |
|                                                                  | <i>p<sup>a</sup></i> | 0.65      | 0.92      | 0.88      | 0.53      | 0.57      |                                               |
| Confusion-Bewilderment                                           | Placebo              | 13.2±4.3  | -0.9±3.5  | -1.0±3.4  | -1.0±3.7  | -0.8±3.9  | 0.068                                         |
|                                                                  | Eggplant             | 12.3±4.6  | -1.6±3.9  | -0.7±4.4  | -2.4±4.0  | -0.9±3.8  |                                               |
|                                                                  | <i>p<sup>a</sup></i> | 0.37      | 0.44      | 0.75      | 0.097     | 0.83      |                                               |
| Confusion-Bewilderment in participants with normal-high BP       | Placebo              | 13.7±4.0  | -0.9±3.3  | -0.8±3.2  | -0.3±4.2  | 0.0±4.3   | 0.18                                          |
|                                                                  | Eggplant             | 12.1±4.7  | -1.3±3.5  | -0.3±3.7  | -1.7±3.4  | -0.2±3.1  |                                               |
|                                                                  | <i>p<sup>a</sup></i> | 0.19      | 0.66      | 0.60      | 0.21      | 0.83      |                                               |
| Confusion-Bewilderment in participants with grade 1 hypertension | Placebo              | 12.4±4.8  | -1.0±4.0  | -1.2±3.7  | -2.0±2.4  | -2.1±2.5  | 0.15                                          |
|                                                                  | Eggplant             | 12.9±4.7  | -2.4±5.2  | -1.8±6.1  | -4.7±4.8  | -3.2±5.0  |                                               |
|                                                                  | <i>p<sup>a</sup></i> | 0.81      | 0.45      | 0.78      | 0.081     | 0.55      |                                               |
| Depression-Dejection                                             | Placebo              | 9.5±8.3   | -0.5±5.3  | -0.5±5.7  | -1.5±7.1  | -1.7±7.9  | 0.84                                          |
|                                                                  | Eggplant             | 7.2±6.3   | -0.6±5.3  | -0.3±5.1  | -1.9±5.3  | -0.9±4.5  |                                               |
|                                                                  | <i>p<sup>a</sup></i> | 0.18      | 0.96      | 0.84      | 0.81      | 0.61      |                                               |

Online Supporting Material

|                                                                |                       |           |           |           |           |           |      |
|----------------------------------------------------------------|-----------------------|-----------|-----------|-----------|-----------|-----------|------|
| Depression-Dejection in participants with normal-high BP       | Placebo               | 9.5±8.7   | -0.1±5.2  | 0.3±5.7   | -1.1±8.0  | -1.3±8.6  | 0.94 |
|                                                                | Eggplant              | 7.5±6.9   | -1.6±3.4  | -1.3±3.7  | -2.3±5.5  | -0.8±4.6  |      |
|                                                                | <i>p</i> <sup>a</sup> | 0.35      | 0.23      | 0.23      | 0.54      | 0.81      |      |
| Depression-Dejection in participants with grade 1 hypertension | Placebo               | 9.5±7.8   | -1.1±5.6  | -2.0±5.6  | -2.2±5.4  | -2.5±6.6  | 0.18 |
|                                                                | Eggplant              | 6.4±4.1   | 2.6±8.4   | 2.8±7.5   | -0.7±4.9  | -1.3±4.3  |      |
|                                                                | <i>p</i> <sup>a</sup> | 0.30      | 0.21      | 0.089     | 0.49      | 0.65      |      |
| Fatigue-Inertia                                                | Placebo               | 7.5±5.1   | -0.3±3.5  | -0.6±2.5  | -1.3±3.5  | -0.9±2.9  | 0.80 |
|                                                                | Eggplant              | 7.2±4.1   | -0.1±4.5  | -0.4±4.4  | -1.5±3.9  | -0.4±3.8  |      |
|                                                                | <i>p</i> <sup>a</sup> | 0.80      | 0.78      | 0.84      | 0.83      | 0.53      |      |
| Fatigue-Inertia in participants with normal-high BP            | Placebo               | 8.3±5.4   | -0.2±3.8  | 0.0±2.5   | -0.9±3.9  | -0.2±2.8  | 0.75 |
|                                                                | Eggplant              | 7.1±4.2   | -0.1±3.1  | -0.4±3.2  | -1.3±3.2  | -0.2±3.1  |      |
|                                                                | <i>p</i> <sup>a</sup> | 0.37      | 0.90      | 0.57      | 0.68      | 0.99      |      |
| Fatigue-Inertia in participants with grade 1 hypertension      | Placebo               | 6.1±4.5   | -0.5±3.1  | -1.5±2.1  | -2.0±2.7  | -2.1±2.7  | 0.61 |
|                                                                | Eggplant              | 7.6±3.8   | 0.0±7.7   | -0.2±7.3  | -2.0±5.6  | -1.1±5.8  |      |
|                                                                | <i>p</i> <sup>a</sup> | 0.42      | 0.85      | 0.61      | 1.00      | 0.56      |      |
| Tension-Anxiety                                                | Placebo               | 14.7±8.0  | -1.2±4.3  | -1.3±5.3  | -1.5±6.9  | -1.5±5.9  | 0.36 |
|                                                                | Eggplant              | 13.4±5.4  | -2.0±5.5  | -0.7±6.3  | -2.3±6.3  | -1.0±7.1  |      |
|                                                                | <i>p</i> <sup>a</sup> | 0.40      | 0.47      | 0.63      | 0.59      | 0.70      |      |
| Tension-Anxiety in participants with normal-high BP            | Placebo               | 15.3±8.6  | -1.2±4.7  | -1.3±5.0  | -1.4±7.8  | -1.7±6.4  | 0.40 |
|                                                                | Eggplant              | 13.1±5.4  | -2.0±3.8  | -0.2±4.8  | -1.9±5.4  | -0.6±7.1  |      |
|                                                                | <i>p</i> <sup>a</sup> | 0.26      | 0.49      | 0.42      | 0.79      | 0.54      |      |
| Tension-Anxiety in participants with grade 1 hypertension      | Placebo               | 13.7±7.0  | -1.1±3.6  | -1.5±6.0  | -1.6±5.3  | -1.3±4.9  | 0.79 |
|                                                                | Eggplant              | 14.4±5.7  | -1.8±9.3  | -2.2±9.9  | -3.4±8.8  | -2.2±7.4  |      |
|                                                                | <i>p</i> <sup>a</sup> | 0.80      | 0.79      | 0.82      | 0.53      | 0.71      |      |
| Vigor-Activity                                                 | Placebo               | 12.7±6.5  | -0.9±4.2  | -0.3±3.3  | -0.3±5.3  | -0.8±5.4  | 0.41 |
|                                                                | Eggplant              | 13.1±7.1  | 0.3±4.5   | -0.2±5.2  | -0.4±4.4  | -0.8±4.4  |      |
|                                                                | <i>p</i> <sup>a</sup> | 0.82      | 0.24      | 0.88      | 0.91      | 0.98      |      |
| Vigor-Activity in participants with normal-high BP             | Placebo               | 11.8±5.1  | -0.5±4.5  | 0.1±3.6   | 0.0±5.3   | -0.4±5.8  | 0.60 |
|                                                                | Eggplant              | 13.9±6.8  | -0.6±3.4  | -1.2±4.0  | -1.1±4.4  | -1.1±4.7  |      |
|                                                                | <i>p</i> <sup>a</sup> | 0.22      | 0.93      | 0.22      | 0.41      | 0.62      |      |
| Vigor-Activity in participants with grade 1 hypertension       | Placebo               | 14.3±8.3  | -1.6±3.8  | -1.0±2.8  | -0.8±5.4  | -1.6±4.7  | 0.54 |
|                                                                | Eggplant              | 10.7±7.8  | 2.9±6.5   | 3.0±7.1   | 1.7±3.9   | 0.1±3.6   |      |
|                                                                | <i>p</i> <sup>a</sup> | 0.30      | 0.042*    | 0.14      | 0.25      | 0.36      |      |
| Friendliness                                                   | Placebo               | 10.7±4.1  | 0.1±3.3   | 0.6±3.4   | -0.3±3.7  | -1.0±3.5  | 0.54 |
|                                                                | Eggplant              | 10.6±4.4  | 0.1±2.8   | -0.1±3.3  | -0.5±2.3  | -0.8±2.5  |      |
|                                                                | <i>p</i> <sup>a</sup> | 0.98      | 0.93      | 0.37      | 0.79      | 0.67      |      |
| Friendliness in participants with normal-high BP               | Placebo               | 10.2±4.0  | 0.6±3.6   | 1.5±3.5   | 0.2±4.1   | -0.6±3.9  | 0.16 |
|                                                                | Eggplant              | 11.3±4.1  | -0.4±2.5  | -0.7±3.1  | -1.0±2.3  | -0.9±2.8  |      |
|                                                                | <i>p</i> <sup>a</sup> | 0.36      | 0.23      | 0.017*    | 0.21      | 0.74      |      |
| Friendliness in participants with grade 1 hypertension         | Placebo               | 11.4±4.3  | -0.7±2.6  | -1.0±2.6  | -1.2±2.8  | -1.8±2.6  | 0.83 |
|                                                                | Eggplant              | 8.8±4.9   | 1.6±3.2   | 1.8±3.4   | 0.9±1.7   | -0.2±1.3  |      |
|                                                                | <i>p</i> <sup>a</sup> | 0.19      | 0.077     | 0.033*    | 0.057     | 0.11      |      |
| TMD score before UKT                                           | Placebo               | 41.1±30.1 | -2.4±16.2 | -3.1±14.7 | -5.6±22.8 | -5.0±21.0 | 0.46 |
|                                                                | Eggplant              | 34.6±24.2 | -4.9±19.3 | -2.1±18.3 | -9.4±21.1 | -3.1±20.6 |      |

## Online Supporting Material

|                                                                | <i>p</i> <sup>a</sup> | 0.30      | 0.54      | 0.81      | 0.45       | 0.68      |      |
|----------------------------------------------------------------|-----------------------|-----------|-----------|-----------|------------|-----------|------|
| TMD score before UKT in participants with normal-high BP       | Placebo               | 44.2±30.7 | -2.3±17.3 | -1.6±15.4 | -3.4±27.0  | -3.3±24.7 |      |
|                                                                | Eggplant              | 33.6±26.2 | -4.9±15.5 | -1.3±13.7 | -7.9±20.2  | -1.3±20.1 | 0.66 |
|                                                                | <i>p</i> <sup>a</sup> | 0.18      | 0.57      | 0.94      | 0.49       | 0.74      |      |
| TMD score before UKT in participants with grade 1 hypertension | Placebo               | 35.8±29.2 | -2.5±14.5 | -5.6±13.7 | -9.3±12.5  | -8.0±12.5 |      |
|                                                                | Eggplant              | 37.9±17.9 | -4.7±29.0 | -4.6±29.2 | -13.8±24.3 | -8.4±22.1 | 0.50 |
|                                                                | <i>p</i> <sup>a</sup> | 0.85      | 0.81      | 0.91      | 0.55       | 0.95      |      |

Values are shown as mean ± standard deviation. *p*<sup>a</sup>: Student's *t*-test was used for data analysis. \**p* < 0.05, \*\**p* < 0.01 vs. placebo group. ΔWeek 4: changes in values from baseline to week 4; ΔWeek 8: changes in values from baseline to week 8; ΔWeek 12: changes in values from baseline to week 12; ΔWeek 16: changes in values from baseline to four weeks after the end of ingestion. BP: Blood pressure; TMD: Total Mood Disturbance; UKT: Uchida-Kraepelin Psychodiagnostic Test.

**Table S5.** Dietary nutrients consumed by participants during the study.

|                        |                       | Week 0       | ΔWeek 4     | ΔWeek 8     | ΔWeek 12    | ΔWeek 16    |
|------------------------|-----------------------|--------------|-------------|-------------|-------------|-------------|
| Calorie<br>(kcal)      | Placebo               | 1889.6±391.3 | -19.7±253.2 | -39.4±203.4 | -5.9±252.4  | -41.0±239.2 |
|                        | Eggplant              | 1818.5±464.1 | -18.7±301.0 | -33.3±325.4 | -88.7±326.8 | -23.9±340.7 |
|                        | <i>p</i> <sup>a</sup> | 0.47         | 0.99        | 0.92        | 0.22        | 0.80        |
| Protein<br>(g)         | Placebo               | 64.7±16.2    | 0.4±9.0     | 0.1±10.0    | 0.8±10.6    | -0.2±8.7    |
|                        | Eggplant              | 64.9±17.7    | -0.8±13.2   | -0.5±10.0   | -3.1±11.6   | -0.8±14.1   |
|                        | <i>p</i> <sup>a</sup> | 0.96         | 0.66        | 0.81        | 0.13        | 0.82        |
| Lipid<br>(g)           | Placebo               | 64.7±20.7    | 0.1±9.6     | -1.2±11.3   | 1.5±10.8    | -0.4±11.2   |
|                        | Eggplant              | 63.4±20.0    | -2.4±12.2   | -3.2±12.7   | -5.7±12.9   | -2.1±14.2   |
|                        | <i>p</i> <sup>a</sup> | 0.79         | 0.33        | 0.46        | 0.009**     | 0.56        |
| Carbohydrate<br>(g)    | Placebo               | 250.8±49.4   | -5.5±41.3   | -7.2±28.0   | -5.4±36.8   | -8.9±35.1   |
|                        | Eggplant              | 234.4±65.2   | 2.1±43.5    | 0.3±47.2    | -4.2±46.2   | 1.7±44.4    |
|                        | <i>p</i> <sup>a</sup> | 0.21         | 0.43        | 0.39        | 0.90        | 0.25        |
| Dietary fiber<br>(g)   | Placebo               | 12.4±4.0     | 0.2±2.0     | 0.4±2.2     | 0.4±2.0     | 0.1±2.0     |
|                        | Eggplant              | 12.1±4.3     | 0.0±2.3     | -0.4±2.4    | -0.7±2.7    | -0.3±2.9    |
|                        | <i>p</i> <sup>a</sup> | 0.76         | 0.57        | 0.16        | 0.035*      | 0.57        |
| Sodium chloride<br>(g) | Placebo               | 9.3±3.0      | -0.3±2.5    | -0.5±1.9    | -0.6±2.1    | -0.6±2.0    |
|                        | Eggplant              | 8.2±2.6      | -0.1±1.9    | 0.0±1.6     | -0.3±1.8    | 0.2±2.6     |
|                        | <i>p</i> <sup>a</sup> | 0.091        | 0.62        | 0.23        | 0.49        | 0.13        |

Values are shown as mean ± standard deviation. *p*<sup>a</sup>: Student's *t*-test was used for data analysis. \**p* < 0.05, \*\**p* < 0.01 vs. placebo group. ΔWeek 4: changes in values from baseline to week 4; ΔWeek 8: changes in values from baseline to week 8; ΔWeek 12: changes in values from baseline to week 12; ΔWeek 16: changes in values from baseline to four weeks after the end of ingestion.

**Table S6.** Body composition, complete blood count, liver function, renal function, lipid profiles, blood glucose profiles, and urinary tests.

|                               |                       | Week 0     | ΔWeek 4   | ΔWeek 8   | ΔWeek 12  | ΔWeek 16  |
|-------------------------------|-----------------------|------------|-----------|-----------|-----------|-----------|
| BW<br>(kg)                    | Placebo               | 60.5±10.6  | -0.1±0.9  | -0.1±1.1  | 0.3±1.5   | 0.4±1.3   |
|                               | Eggplant              | 59.7±11.4  | 0.0±0.8   | -0.1±0.8  | 0.2±1.0   | 0.4±1.1   |
|                               | <i>p</i> <sup>a</sup> | 0.75       | 0.86      | 0.93      | 0.61      | 0.99      |
| BFR<br>(%)                    | Placebo               | 28.3±6.6   | 0.7±0.9   | 1.1±1.1   | 1.6±1.3   | 1.3±1.5   |
|                               | Eggplant              | 27.7±6.7   | 1.0±0.9   | 1.3±1.0   | 1.4±1.1   | 1.4±1.0   |
|                               | <i>p</i> <sup>a</sup> | 0.64       | 0.16      | 0.32      | 0.59      | 0.62      |
| BMI<br>(kg/m <sup>2</sup> )   | Placebo               | 22.9±2.7   | 0.0±0.3   | 0.0±0.4   | 0.1±0.6   | 0.2±0.5   |
|                               | Eggplant              | 22.9±3.3   | 0.0±0.3   | 0.0±0.3   | 0.1±0.4   | 0.2±0.4   |
|                               | <i>p</i> <sup>a</sup> | 0.90       | 0.99      | 0.94      | 0.52      | 0.95      |
| WBC<br>(×10 <sup>3</sup> /μL) | Placebo               | 5.3±1.0    | 0.1±0.9   | -0.3±1.0  | 0.1±0.9   | 0.1±1.1   |
|                               | Eggplant              | 5.9±1.3    | 0.2±0.8   | -0.2±0.9  | 0.1±0.8   | -0.1±0.9  |
|                               | <i>p</i> <sup>a</sup> | 0.020*     | 0.81      | 0.62      | 0.96      | 0.39      |
| RBC<br>(×10 <sup>4</sup> /μL) | Placebo               | 473.4±38.8 | 7.8±19.8  | 12.2±21.9 | 9.2±22.9  | 4.5±20.4  |
|                               | Eggplant              | 468.3±38.3 | 6.9±15.2  | 10.0±17.1 | 6.6±16.1  | 5.2±15.1  |
|                               | <i>p</i> <sup>a</sup> | 0.52       | 0.81      | 0.61      | 0.54      | 0.86      |
| Hb<br>(g/dL)                  | Placebo               | 14.0±1.1   | 0.2±0.5   | 0.5±0.7   | 0.3±0.7   | 0.1±0.6   |
|                               | Eggplant              | 14.0±1.2   | 0.2±0.4   | 0.4±0.5   | 0.3±0.6   | 0.2±0.5   |
|                               | <i>p</i> <sup>a</sup> | 0.76       | 0.78      | 0.63      | 0.94      | 0.71      |
| Htc<br>(%)                    | Placebo               | 42.5±3.2   | 1.2±1.9   | 1.3±2.0   | 1.0±2.2   | 0.3±1.8   |
|                               | Eggplant              | 42.4±3.3   | 0.8±1.5   | 1.1±1.7   | 0.8±1.6   | 0.2±1.4   |
|                               | <i>p</i> <sup>a</sup> | 0.93       | 0.23      | 0.55      | 0.77      | 0.82      |
| Plt<br>(×10 <sup>4</sup> /μL) | Placebo               | 24.3±4.5   | -0.5±2.0  | -0.5±2.4  | 0.3±2.6   | 0.3±2.2   |
|                               | Eggplant              | 24.7±5.4   | 0.8±1.9   | 0.3±2.8   | 1.0±2.6   | 1.4±2.9   |
|                               | <i>p</i> <sup>a</sup> | 0.70       | 0.003**   | 0.12      | 0.24      | 0.053     |
| AST<br>(U/L)                  | Placebo               | 20.7±5.8   | 0.6±3.6   | 0.0±3.1   | 1.1±2.9   | 2.1±6.3   |
|                               | Eggplant              | 20.5±4.0   | 0.0±2.5   | 0.6±3.7   | 1.0±3.1   | 2.0±4.1   |
|                               | <i>p</i> <sup>a</sup> | 0.84       | 0.39      | 0.40      | 0.89      | 0.94      |
| ALT<br>(U/L)                  | Placebo               | 18.9±9.7   | 0.6±4.9   | 0.3±4.8   | 2.2±4.6   | 1.2±6.5   |
|                               | Eggplant              | 18.7±5.2   | 0.9±5.5   | 0.7±6.3   | 2.0±5.0   | 2.5±8.4   |
|                               | <i>p</i> <sup>a</sup> | 0.88       | 0.83      | 0.75      | 0.80      | 0.41      |
| γ-GTP<br>(U/L)                | Placebo               | 27.0±23.1  | 1.2±5.8   | 1.2±6.6   | 3.5±12.8  | 0.7±15.6  |
|                               | Eggplant              | 26.6±20.4  | 4.5±18.3  | 2.5±9.4   | 1.2±6.0   | 3.5±6.5   |
|                               | <i>p</i> <sup>a</sup> | 0.93       | 0.25      | 0.45      | 0.28      | 0.27      |
| ALP<br>(U/L)                  | Placebo               | 205.0±54.5 | 5.3±13.8  | 9.2±18.2  | 13.7±23.3 | 13.8±46.4 |
|                               | Eggplant              | 214.4±55.9 | 3.0±15.1  | 5.5±19.3  | 7.6±23.2  | 5.5±21.6  |
|                               | <i>p</i> <sup>a</sup> | 0.40       | 0.44      | 0.36      | 0.23      | 0.29      |
| LDH<br>(U/L)                  | Placebo               | 183.1±28.4 | -3.0±11.6 | -8.6±16.8 | -4.0±13.2 | 0.8±16.8  |
|                               | Eggplant              | 193.2±27.3 | -2.1±12.6 | -6.9±12.0 | -0.6±19.0 | 3.4±26.6  |
|                               | <i>p</i> <sup>a</sup> | 0.079      | 0.72      | 0.58      | 0.33      | 0.58      |
| BUN<br>(mg/dL)                | Placebo               | 14.3±3.6   | -0.6±2.6  | -0.2±3.1  | -0.3±3.0  | 0.0±2.4   |
|                               | Eggplant              | 14.6±3.9   | -0.7±2.6  | 0.0±3.1   | -1.0±3.0  | -0.6±3.0  |

Online Supporting Material

|                    |                       |            |           |           |           |           |
|--------------------|-----------------------|------------|-----------|-----------|-----------|-----------|
|                    | <i>p</i> <sup>a</sup> | 0.68       | 0.84      | 0.74      | 0.28      | 0.26      |
| CRE<br>(mg/dL)     | Placebo               | 0.8±0.2    | 0.0±0.0   | 0.0±0.1   | 0.0±0.1   | 0.0±0.0   |
|                    | Eggplant              | 0.8±0.2    | 0.0±0.1   | 0.0±0.1   | 0.0±0.1   | 0.0±0.1   |
|                    | <i>p</i> <sup>a</sup> | 0.79       | 0.89      | 0.85      | 0.33      | 0.57      |
| UA<br>(mg/dL)      | Placebo               | 5.0±1.1    | 0.2±0.5   | 0.2±0.7   | 0.2±0.6   | 0.1±0.5   |
|                    | Eggplant              | 5.2±1.3    | 0.2±0.5   | 0.1±0.5   | 0.1±0.5   | 0.0±0.6   |
|                    | <i>p</i> <sup>a</sup> | 0.33       | 0.84      | 0.51      | 0.26      | 0.76      |
| TC<br>(mg/dL)      | Placebo               | 223.6±31.7 | 6.0±16.3  | 5.8±17.0  | 10.5±15.9 | 1.9±17.4  |
|                    | Eggplant              | 230.7±36.9 | 3.1±18.3  | -2.0±19.8 | 4.8±20.9  | -6.9±23.4 |
|                    | <i>p</i> <sup>a</sup> | 0.32       | 0.41      | 0.048*    | 0.15      | 0.048*    |
| LDL-C<br>(mg/dL)   | Placebo               | 136.2±28.4 | 3.3±14.4  | 6.2±15.7  | 7.8±13.7  | 3.4±15.5  |
|                    | Eggplant              | 137.1±35.4 | 0.5±16.5  | -0.2±16.5 | 4.1±18.8  | -2.4±19.6 |
|                    | <i>p</i> <sup>a</sup> | 0.89       | 0.38      | 0.063     | 0.30      | 0.13      |
| HDL-C<br>(mg/dL)   | Placebo               | 67.3±16.4  | -1.3±5.5  | -1.0±6.7  | 2.1±5.7   | 1.6±6.5   |
|                    | Eggplant              | 75.2±16.7  | -2.2±5.8  | -2.6±5.3  | 0.2±6.1   | -1.4±6.4  |
|                    | <i>p</i> <sup>a</sup> | 0.022*     | 0.41      | 0.22      | 0.13      | 0.036*    |
| TG<br>(mg/dL)      | Placebo               | 100.5±40.9 | 0.3±26.9  | 2.0±26.8  | 1.0±30.8  | -8.9±32.6 |
|                    | Eggplant              | 97.1±44.3  | 11.0±34.5 | 9.4±34.5  | 0.8±37.3  | -0.4±31.3 |
|                    | <i>p</i> <sup>a</sup> | 0.70       | 0.10      | 0.26      | 0.98      | 0.22      |
| FPG<br>(mg/dL)     | Placebo               | 90.7±10.2  | -0.8±5.8  | -1.7±5.0  | -0.3±4.4  | 0.0±7.6   |
|                    | Eggplant              | 89.0±8.8   | -2.1±4.8  | -1.7±3.7  | -0.8±4.1  | -1.0±6.2  |
|                    | <i>p</i> <sup>a</sup> | 0.39       | 0.23      | 0.94      | 0.59      | 0.51      |
| HbA1c<br>(%)       | Placebo               | 5.4±0.4    | 0.0±0.1   | 0.0±0.2   | 0.0±0.2   | -0.1±0.2  |
|                    | Eggplant              | 5.3±0.3    | 0.0±0.1   | 0.1±0.1   | 0.1±0.1   | 0.0±0.1   |
|                    | <i>p</i> <sup>a</sup> | 0.19       | 0.35      | 0.25      | 0.20      | 0.12      |
| Urine pH           | Placebo               | 6.1±0.7    | 0.1±0.6   | 0.1±0.8   | -0.2±0.8  | 0.0±0.8   |
|                    | Eggplant              | 6.1±0.6    | -0.1±0.7  | -0.1±0.7  | -0.1±0.7  | -0.2±0.6  |
|                    | <i>p</i> <sup>a</sup> | 0.85       | 0.14      | 0.40      | 0.79      | 0.28      |
| Urine sugar        | <i>p</i> <sup>b</sup> | 0.33       | 0.39      | 0.33      | 0.39      | 0.33      |
| Urine protein      | <i>p</i> <sup>b</sup> | 0.95       | 0.58      | 0.58      | 0.95      | 0.66      |
| Urine occult blood | <i>p</i> <sup>b</sup> | 0.17       | 0.57      | 0.43      | 0.19      | 0.28      |
| Urine urobilinogen | <i>p</i> <sup>b</sup> | 1.0        | 0.34      | 1.0       | 1.0       | 1.0       |
| Urine ketones      | <i>p</i> <sup>b</sup> | 1.0        | 1.0       | 1.0       | 1.0       | 1.0       |

Values are shown as mean ± standard deviation. *p*<sup>a</sup>: Student's *t*-test was performed. \**p* < 0.05, \*\**p* < 0.01 vs. placebo group. *p*<sup>b</sup>: Fisher's exact probability test was performed. ΔWeek 4: changes in values from baseline to week 4; ΔWeek 8: changes in values from baseline to week 8; ΔWeek 12: changes in values from baseline to week 12; ΔWeek 16: changes in values from baseline to four weeks after the end of ingestion; BW: body weight; BFR: body fat rate; BMI: body mass index; WBC: white blood cell; RBC: red blood cell; Hb: hemoglobin; Htc: hematocrit; Plt: platelet; AST: aspartate aminotransferase; ALT: alanine aminotransferase; γ-GTP: gamma-glutamyl transpeptidase; ALP: alkaline phosphatase; LDH: lactate dehydrogenase; BUN: blood urea nitrogen; CRE: creatinine; UA: uric acid; TC: total cholesterol; LDL-C: low-density lipoprotein cholesterol; HDL-C: high-density lipoprotein cholesterol; TG: triglyceride; FPG: fasting plasma glucose; HbA1c: hemoglobin A1c.
